# Supplementary material
Source: publisher site journal article supplement (https://www.dovepress.com/article/392265)
Supplement: Supplementary file 1 [file get_supplementary_file.php]

**Supplementary Table 1. Level of evidence from items discussed in this review.**

| Item in review |  | Grade |
| --- | --- | --- |
| Clinical features of dumping syndrome | | B, partly A for late dumping symptoms |
| Pathophysiology of dumping syndrome | | B |
| Epidemiology of dumping syndrome | |  |
|  | Prevalence based on self-reported symptoms | C |
|  | Prevalence based on provocative testing | B |
| Diagnosis of dumping syndrome | |  |
|  | when is testing indicated? | N/A |
|  | which test should be performed for confirmation of diagnosis? | B |
| Treatment options |  |  |
|  | diet | B |
|  | acarbose | B |
|  | somatostatin analogues | B |
|  | new perspectives | D, C |
|  | surgical re-intervention | B, C |
|  | new developments in surgical and endoscopic intervention | C |

N/A; not applicable.

Level of evidence based on the GRADE system(77) and partially adapted from the consensus guideline.(5)

A: High quality of evidence: Further research is very unlikely to change our confidence in the estimate of effect; the statement can be supported by several high- quality studies with consistent results or in special cases by one large, high- quality multicentre trial

B: Moderate quality of evidence: Further research is likely to have an important effect on our confidence in the estimate of effect and might change the estimate; the statement can be supported by one high- quality study or several studies with some limitations

C: Low quality of evidence: Further research is very likely to have an important effect on our confidence in the estimate of effect and is likely to change the estimate; the statement can besupported by one or more studies with severe limitations

D: Very low quality of evidence: Any estimate of effect is very uncertain; the statement can be supported by expert opinion or one or more studies with very severe limitations, or there might be no direct research evidence
